# Supplementary material
Source: Springer Nature journal article supplement (https://www.springermedizin.de/resource/supplementary/12960_2008_207_MOESM2_ESM.pdf/9570656)

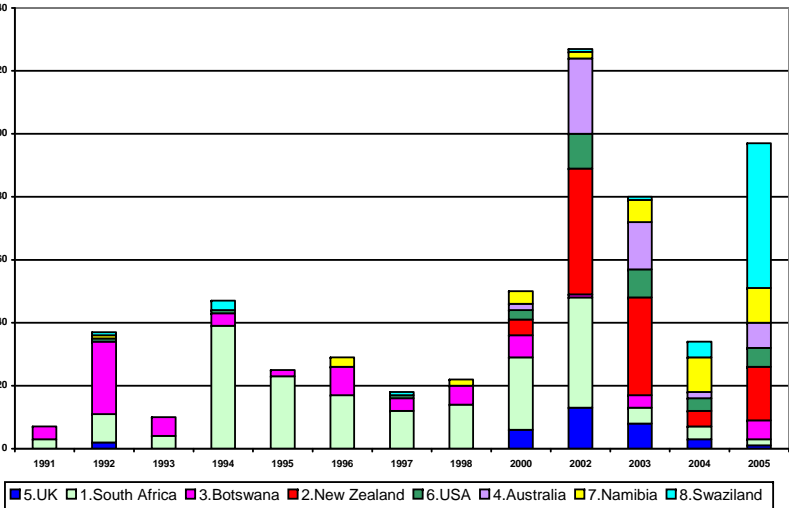

Source : GNC, 2005

Supplement: MOESM2 [file 9570656]
